# Supplementary material for: Combining SiRPα decoy–coengineered T cells and antibodies augments macrophage-mediated phagocytosis of tumor cells
Source: PubMed Central journal article supplement (PMC11142748; doi:10.1172/jci161660), 2024-04-23
Supplement: jci-134-161660-s062.pdf [file jci-134-161660-s062.pdf]

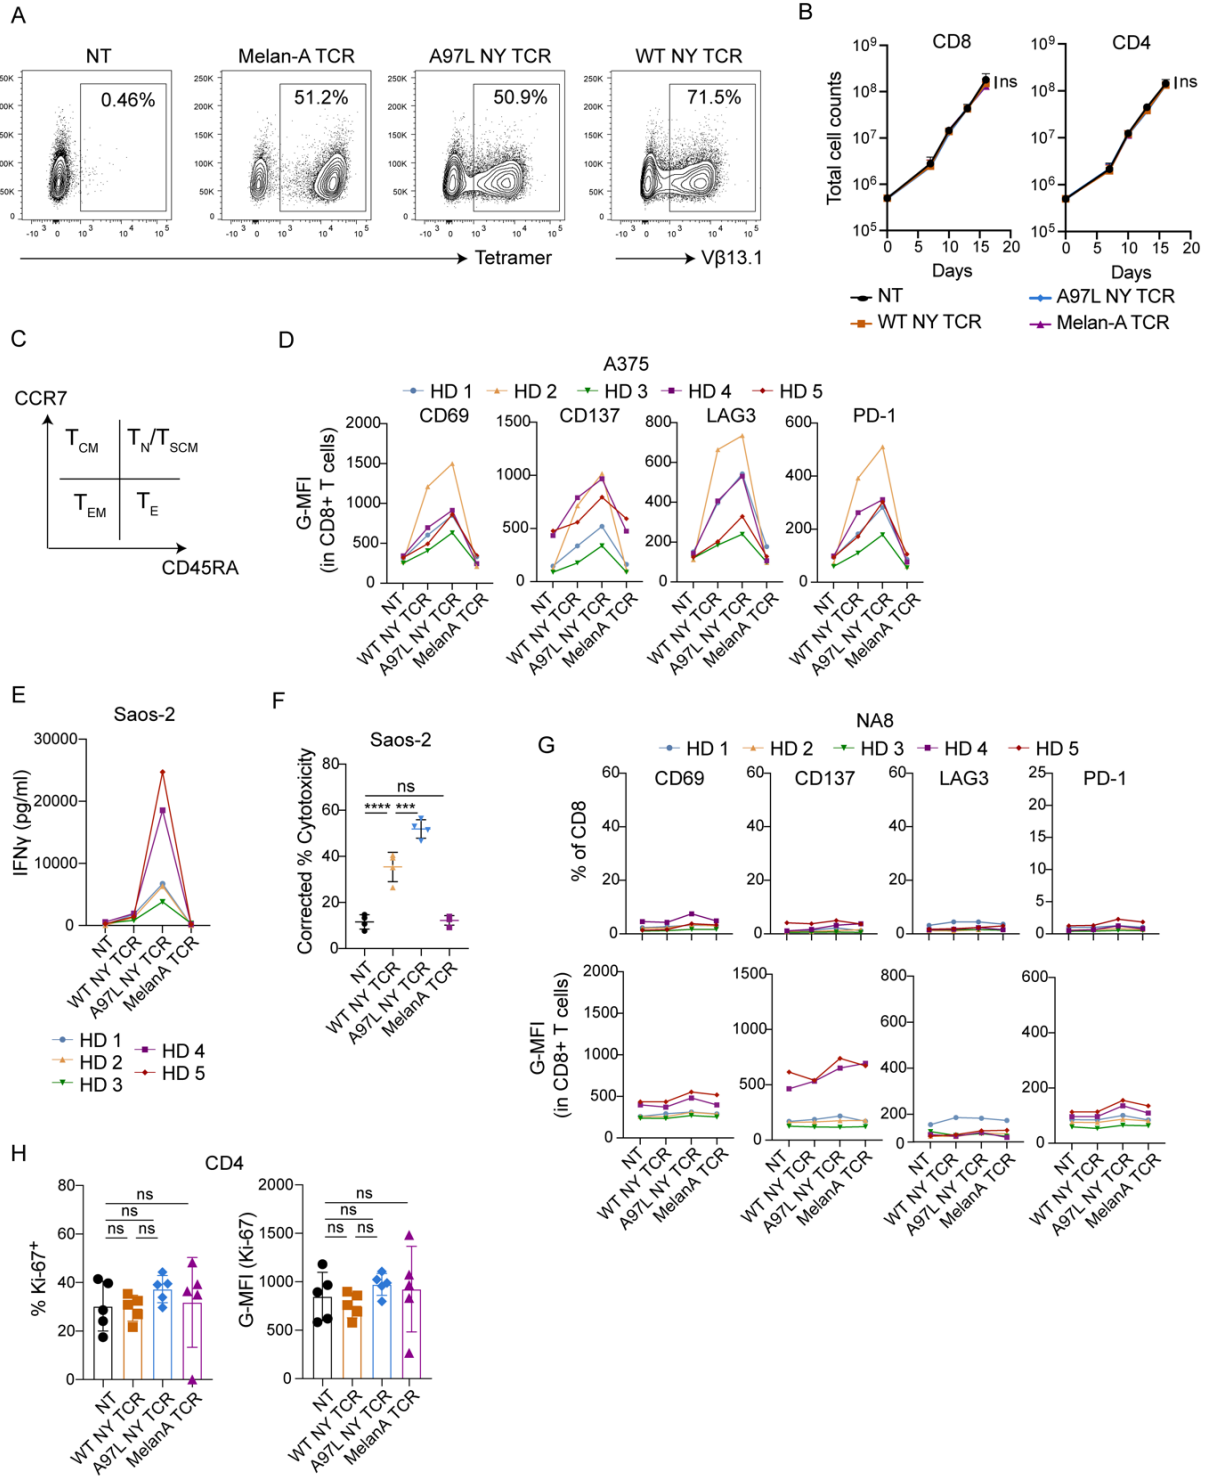

**Supplemental Figure 1. Phenotype and function of TCR-engineered T-cells. (A)** Transduction efficiency of CD4<sup>+</sup> T-cells with TCRs evaluated by tetramer or anti-Vβ13.1 Ab staining (data representative of n=5 donors). **(B)** Total counts of CD8<sup>+</sup> and CD4<sup>+</sup> T-cells obtained in vitro over 16 days of culture (n=4). **(C)** Staining and gating strategy to evaluate effector and memory phenotypes within cultures of rested T-cells, transduced or not to express a TCR (Effector, T<sub>E</sub>; Effector Memory,

$T_{EM}$ ; Central Memory,  $T_{CM}$ ; Naïve/Stem-cell-like Memory,  $T_{N/SCM}$ ). **(D)** Expression (G-MFI) of activation markers and checkpoint receptors on  $CD8^+$  T-cells 24h post-stimulation with  $A2^+/NY^+$  A375 tumor cells (n=5), HD: Healthy Donor. **(E)**  $IFN\gamma$  secretion levels by TCR-modified T-cells 24h post-stimulation with Saos-2 tumor cells at E:T = 1:1 (n=5), HD: Healthy Donor. **(F)** Frequency of AnnexinV<sup>+</sup>DAPI<sup>+</sup> cells, corrected to tumor alone, in 24h co-cultures of Saos-2 tumor cells with TCR-T-cells at E:T=1:1 (n=4). **(G)** Expression (frequency and G-MFI) of activation markers and checkpoint receptors on  $CD8^+$ T-cells 24h post-stimulation with  $A2^+/NY^-$  NA8 tumor cells (n=5), HD: Healthy Donor. **(H)** Frequency (left) and G-MFI (right) of Ki-67 expression within intratumoral human  $CD4^+$ T-cells 7 days post-ACT (n=5, data representative of 2 independent experiments). Statistical analysis by two-way analysis of variance (ANOVA) (B) or one-way ANOVA (F, H) with correction for multiple comparisons by post hoc Tukey's test (B, F and H). \*\*\*\*P < 0.0001; \*\*\*P < 0.001; \*\*P < 0.01; \*P < 0.05.

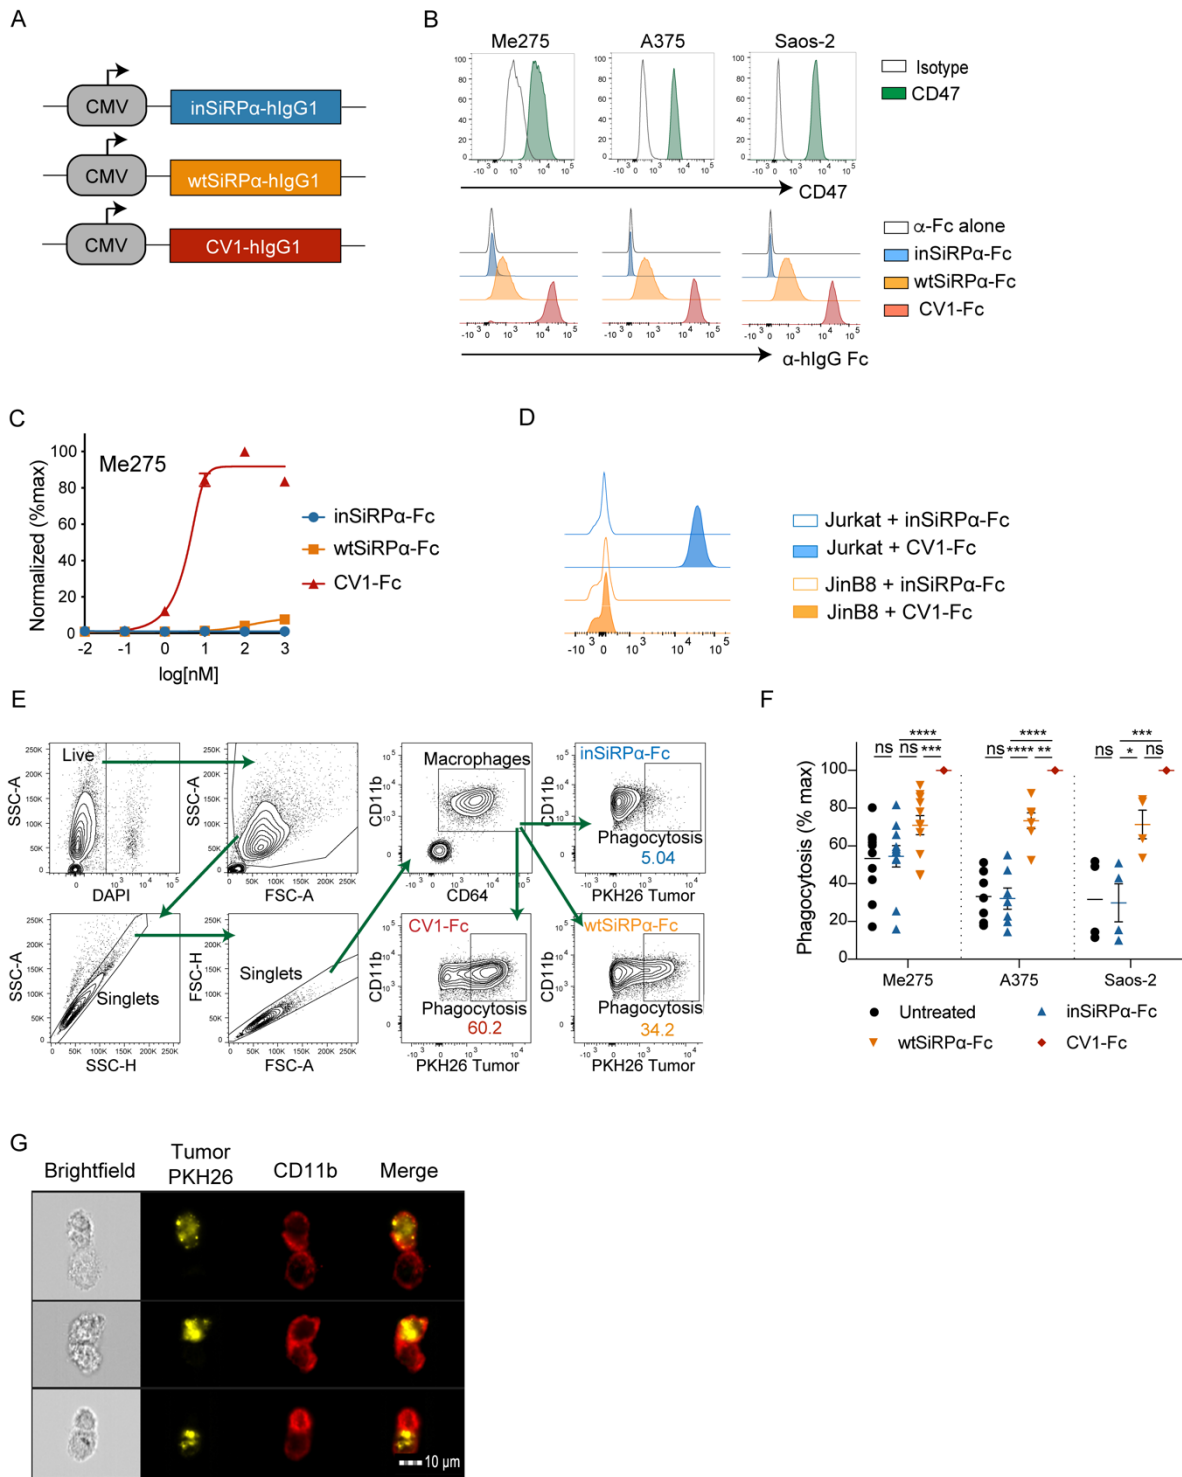

**Supplemental Figure 2. Soluble SiRPa-Fc binds CD47 on tumor cells, enabling enhanced phagocytosis by human MDMs.** (A) Schematic of expression vectors encoding human inSiRPa-Fc, wtSiRPa-Fc, and CV1-Fc proteins. (B) Panel of HLA-A2<sup>+</sup> NY-ESO-1<sup>+</sup> tumor cell lines expressing CD47 on their cell surface (top) and detection of wtSiRPa-Fc and CV1-Fc soluble protein binding on tumor CD47 by anti-human IgG Fc Ab staining (bottom). (C) Binding of increasing concentrations of SiRPa-Fc to CD47 on Me275 tumor cells (data representative of n=2 independent studies). (D) SiRPa-

Fc binding profile on CD47<sup>+</sup> Jurkat and CD47-deficient JinB8 cells (data representative of n=3 independent studies). **(E)** Gating strategy for flow cytometric detection of PKH26-labeled tumor cell phagocytosis by human myeloid-derived macrophages (MDMs) in vitro. **(F)** Phagocytosis of PKH26-labeled tumor cells by human MDMs in the presence of 10ug/ml soluble SiRPa-Fc proteins. Phagocytosis is normalized to the maximal response of each individual donor (n ≥ 4). Data represent mean ± SEM. **(G)** Representative Amnis ImageStream images of human MDMs engulfing PKH26-labeled Saos-2 tumor cells after treatment with 10ug/ml CV1-Fc. Statistical analysis by one-way analysis of variance (ANOVA) (F) with correction for multiple comparisons by post hoc Tukey's test on pooled donors (F). \*\*\*\*P < 0.0001; \*\*\*P < 0.001; \*\*P < 0.01; \*P < 0.05.

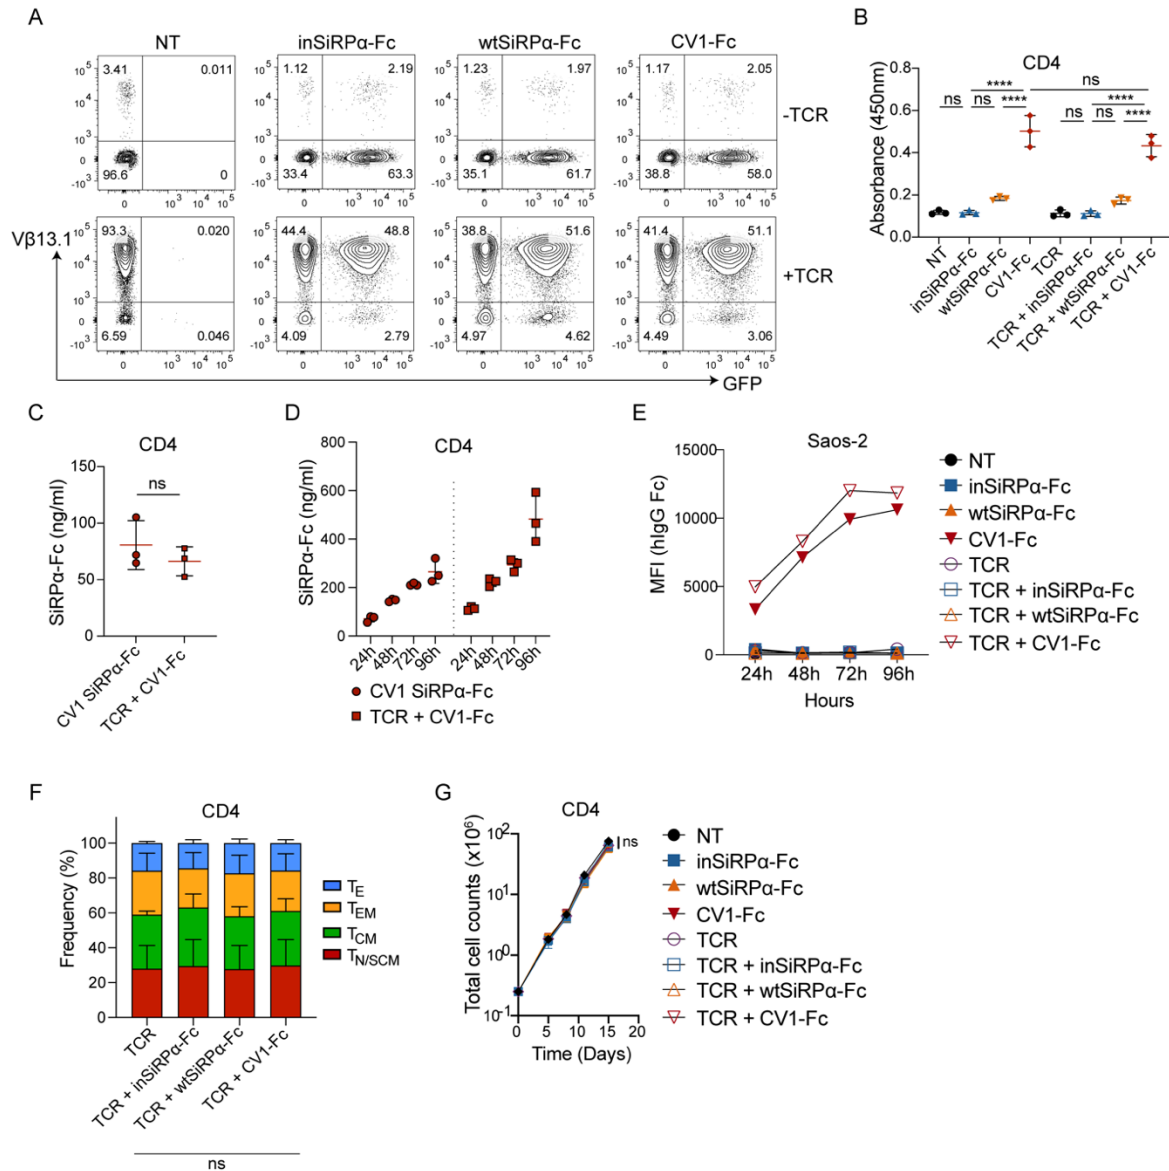

**Supplemental Figure 3. SiRP $\alpha$ -Fc binds to CD47 on tumor cells and increases phagocytosis by human macrophages.** **A)** Expression of SiRP $\alpha$ -Fc and A97L TCR in transduced CD4<sup>+</sup> T-cells, detected by eGFP and anti-V $\beta$ 13.1 Ab staining, respectively (data representative of n=12 donors). **B)** CD47-based ELISA detection of SiRP $\alpha$ -Fc secreted by engineered CD4<sup>+</sup>T-cells (n=3). **C)** Quantification of CD4<sup>+</sup>T-cell-secreted CV1-Fc by CD47-based ELISA (n=3). **D)** Quantification of CV1-Fc accumulated in culture supernatants of engineered CD4<sup>+</sup> T-cells over time. **E)** Binding of CD8<sup>+</sup> T-cell-secreted CV1-Fc on Saos-2 using culture supernatants at 24 to 96 hours (data representative of n=2 independent studies). **F)** Frequency of effector and memory phenotypes of transduced and rested CD4<sup>+</sup>T-cells (n=3) (Effector, T<sub>E</sub>; Effector Memory, T<sub>EM</sub>; Central Memory, T<sub>CM</sub>; Naïve/Stem-cell like Memory, T<sub>N/SCM</sub>). **G)** Expansion of engineered CD4<sup>+</sup>T-cells (n=3). Statistical analysis by one-way analysis of variance (ANOVA) (B and F), unpaired two-tailed t-test (C), or two-way ANOVA (G) with correction for multiple comparisons by post hoc Tukey's test on pooled donors (B and F-G). \*\*\*\*P < 0.0001; \*\*\*P < 0.001; \*\*P < 0.01; \*P < 0.05.

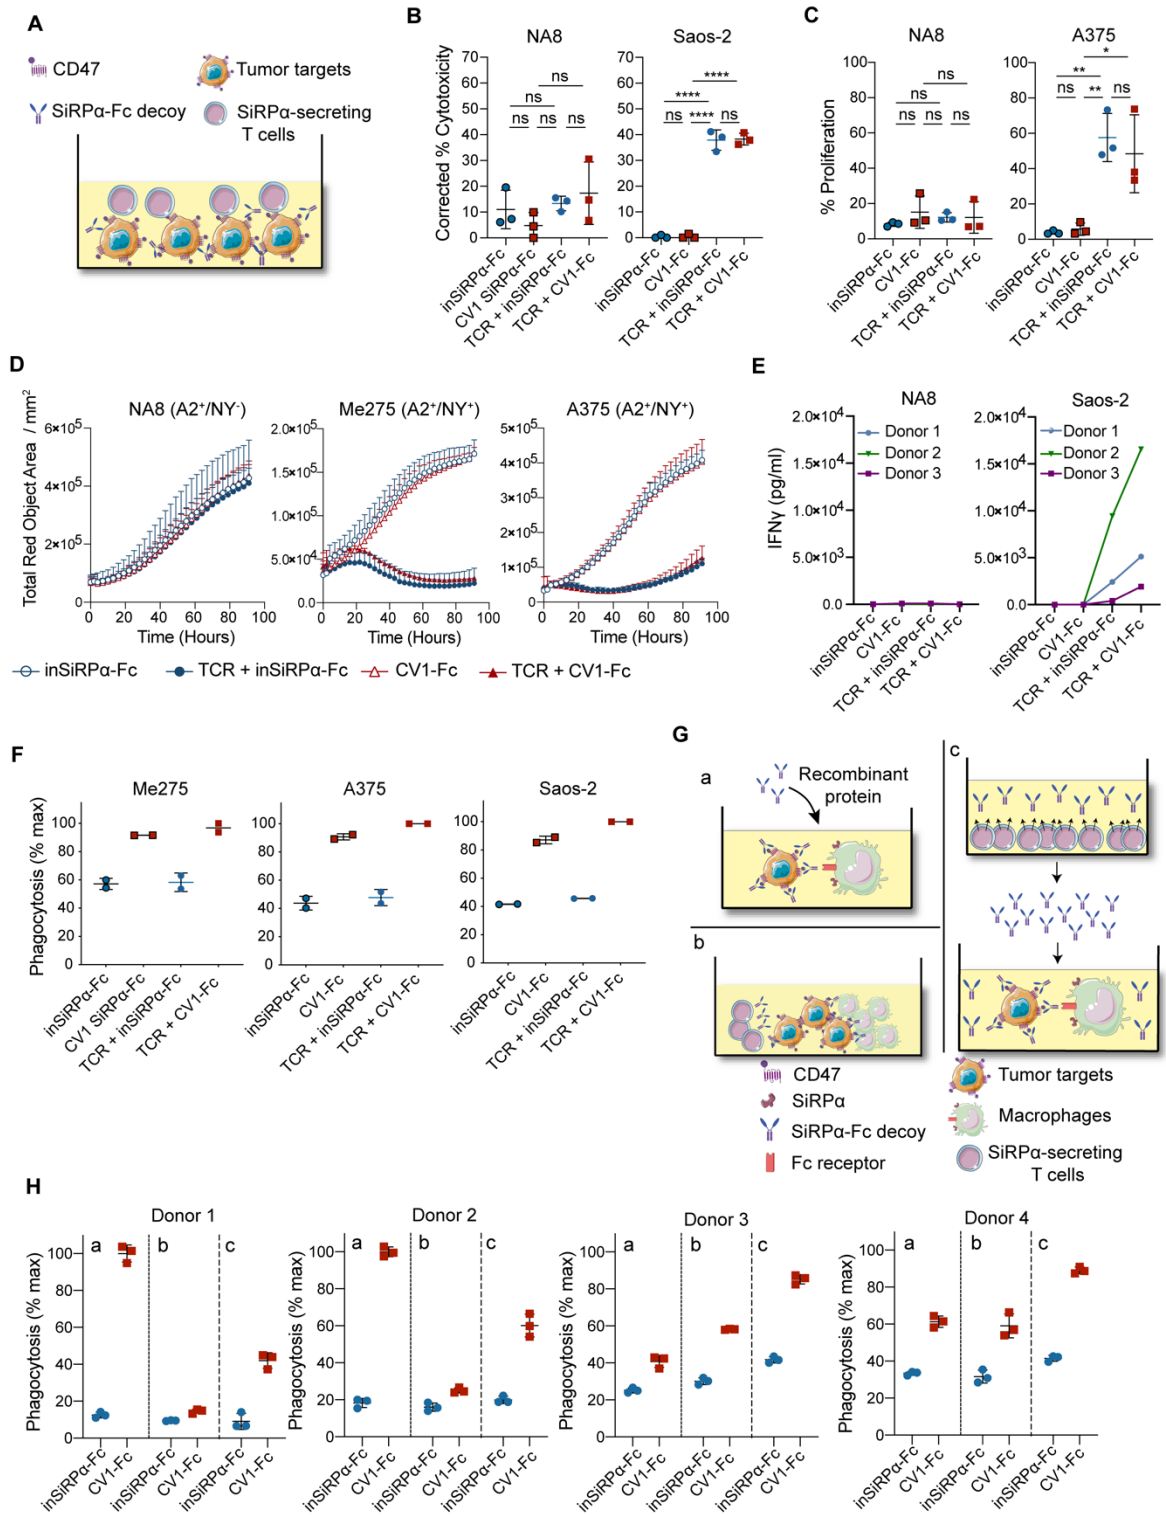

**Supplemental Figure 4. Evaluation of engineered T-cell function as well as macrophage-mediated tumor-cell phagocytosis in the presence of CV1-Fc decoys in different co-culture conditions. (A)** Schematic of tumor cell and engineered T-cell co-culture to evaluate the impact of decoys on effector

function. **(B)** Frequency of Annexin V<sup>+</sup> DAPI<sup>+</sup> cells, corrected to tumor alone, 24h post-stimulation with NA8 or Saos-2 tumor cells (n=3). **(C)** Frequency of proliferating engineered CD8<sup>+</sup>T-cells following stimulation with NA8 or A375 tumor cells (n=3). **(D)** Fluorescent tracking of mKate2<sup>+</sup> tumor cells in co-culture with SiRP $\alpha$ -decoy coengineered A97L-T-cells by live-cell Incucyte imaging (data representative of n=3 donors). **(E)** IFN $\gamma$  production by engineered T-cells 24h post-stimulation with NA8 and Saos-2 tumor cells (n=3 donors). **(F)** Tumor-cell phagocytosis by MDMs in the presence of T-cell-secreted CV1-Fc decoy molecules from single- or TCR dual-transduced T-cell cultures (n=2). **(G)** Schematic of different co-culture conditions to evaluate tumor-cell phagocytosis by macrophages in the presence of CV1-Fc decoy (a = recombinant decoy protein, b = decoy secretion by T-cells in a triple co-culture, c = decoy supernatant). **(H)** Side-by-side comparison of tumor-cell phagocytosis under conditions shown in Fig. S3G for MDMs (n=4). Statistical analysis by one-way analysis of variance (ANOVA) (B-C) with correction for multiple comparisons by post hoc Tukey's test (B-C). \*\*\*\*P< 0.0001; \*\*\*P < 0.001; \*\*P < 0.01; \*P < 0.05.

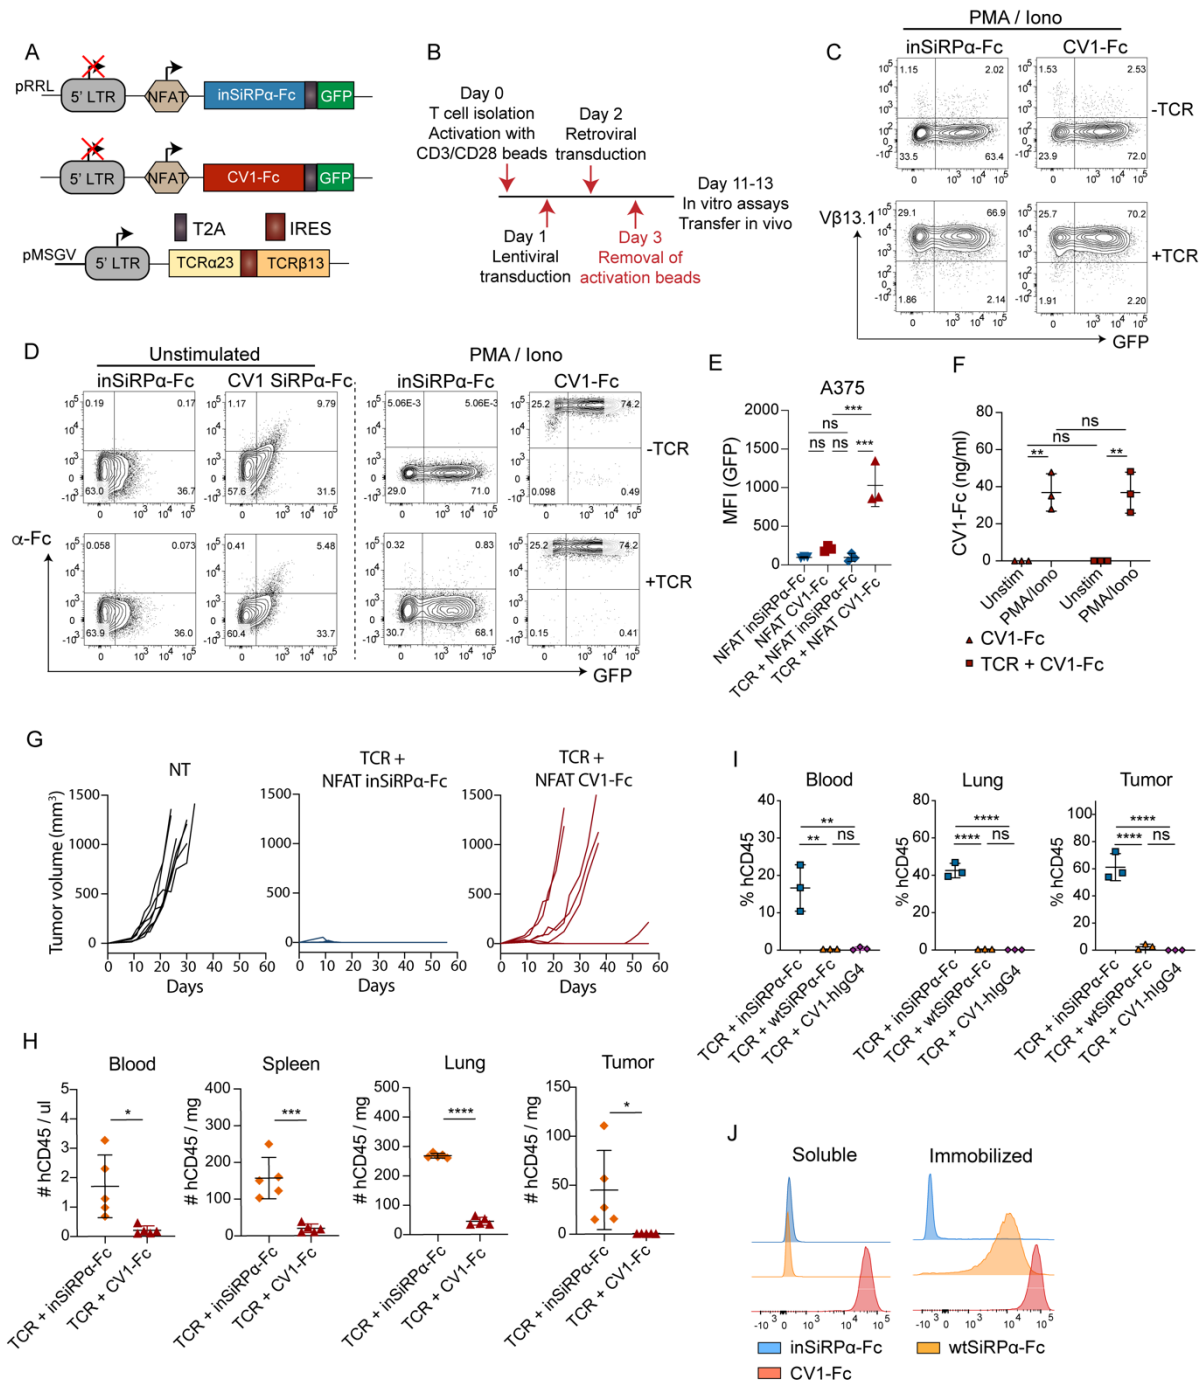

**Supplemental Figure 5. SiRPa-decoys expressed under the 6xNFAT promoter are efficiently secreted upon T-cell activation.** (A) Schematic of lentiviral constructs encoding SiRPa-Fc decoys under 6xNFAT and of a retroviral construct encoding the A97L-TCR. (B) Strategy for optimized T-cell activation, transduction, and expansion to minimize decoy secretion pre-ACT. (C) Detection of SiRPa-Fc and A97L-TCR by eGFP and anti-Vb13 Ab staining, respectively, in rested engineered T-cells re-activated with PMA-Ionomycin for 48h (data representative of n=3 donors). (D) Secreted CV1-Fc detected on the surface of PMA-Ionomycin activated T-cells versus resting T-cells (data representative



of  $n=3$  donors). Gates have been placed based on non-transduced T-cells. **(E)** Flow cytometric evaluation of CV1-Fc expression upon coculture of engineered A97L-T-cells with target tumor cells ( $n=3$ ). **(F)** CD47-based ELISA evaluation of CV1-Fc secretion by engineered T-cells upon PMA-Ionomycin activation ( $n=3$ ). **(G)** Tumor control curves upon ACT with A97L-T-cells expressing SiRP $\alpha$ -decoys under 6xNFAT ( $n=7$ ). **(H)** Ex vivo evaluation of T-cells persisting in the blood, spleen, lung, and tumors of NSG mice 7 days post-ACT ( $n=5$ ). **(I)** Frequency of human CD45<sup>+</sup> cells in harvested tissues 5 days post-ACT with wtSiRP $\alpha$ -Fc and CV1-hIgG4-Fc T-cells ( $n=3$ ). **(J)** Binding of soluble and immobilized recombinant SiRP $\alpha$ -Fc on A375 tumor cells (data representative of  $n=3$  independent studies). Statistical analysis by one-way analysis of variance (ANOVA) (E-F and I) or unpaired, two-tailed t-test (H) with correction for multiple comparisons by post hoc Tukey's test (E-F and I). \*\*\*\* $P < 0.0001$ ; \*\*\* $P < 0.001$ ; \*\* $P < 0.01$ ; \* $P < 0.05$ .

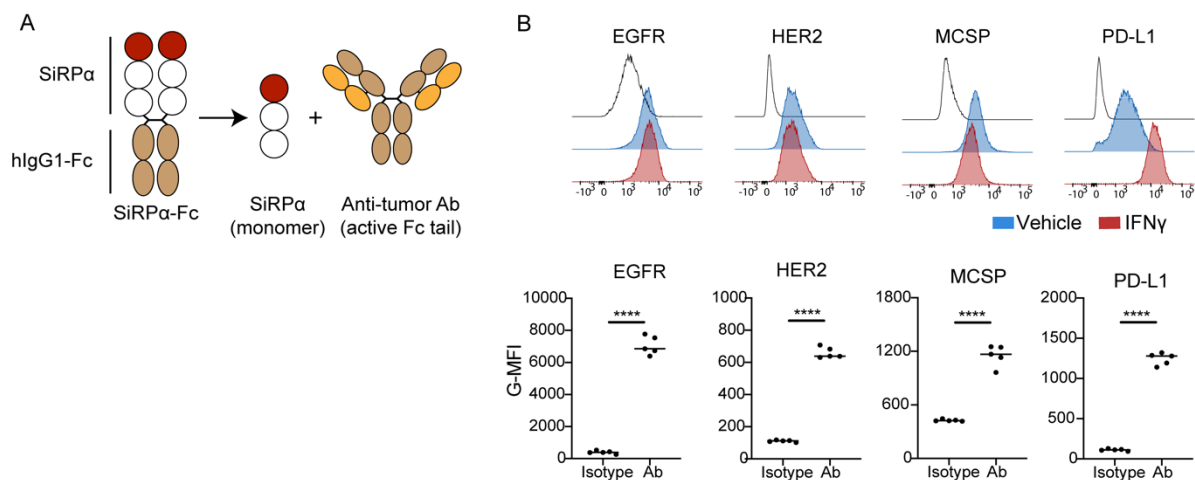

**Supplemental Figure 6. Identification of suitable tumor-specific targets for monoclonal antibodies having antibody-dependent cellular phagocytosis (ADCP) activity.** **(A)** Schematic of strategy to combine SiRP $\alpha$ -monomer with tumor-targeted Abs. **(B)** Expression of EGFR, HER2, MCSP, and PD-L1 on the surface of A375 tumor cells in vitro (top) and in established tumors in vivo (bottom) ( $n=5$ ). Statistical analysis by unpaired, two-tailed t-test (B, bottom panel). \*\*\*\* $P < 0.0001$ ; \*\*\* $P < 0.001$ ; \*\* $P < 0.01$ ; \* $P < 0.05$ .

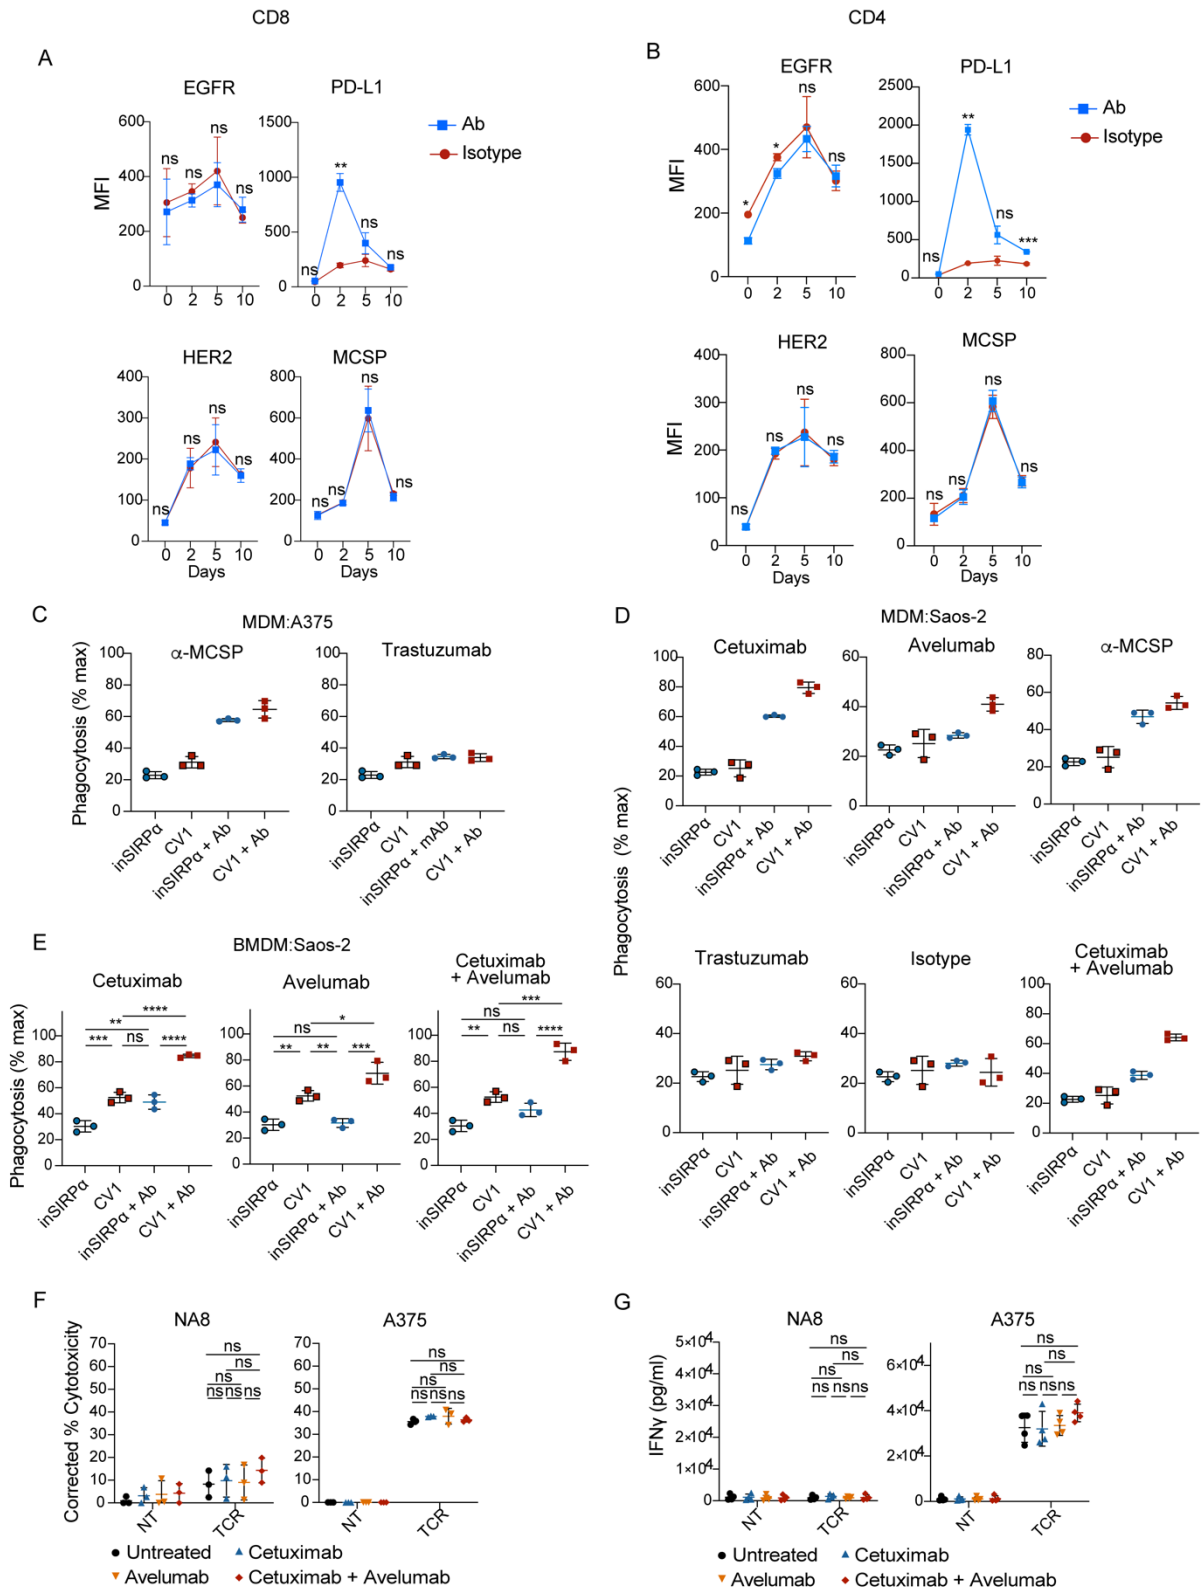

**Supplemental Figure 7. Tumor-targeted monoclonal antibodies cooperate with SiRPa-monomer secreted by gene-modified T-cells to augment macrophage-mediated phagocytosis of tumor cells.**

**A)** Evaluation of EGFR, HER2, MCSP, and PD-L1 expression at different time points by cultured CD8<sup>+</sup> T-cells (n=3) and by **(B)** cultured CD4<sup>+</sup> T-cells (n=3). **(C)** Human-MDM phagocytosis of A375

tumor cells in the presence of T-cell-secreted SiRP $\alpha$ -monomer along with Trastuzumab or anti-MCSP Abs (representative results for  $n \geq 3$  donors). **(D)** Human-MDM phagocytosis of Saos-2 tumor cells in the presence of T-cell-secreted SiRP $\alpha$  monomer along with different tumor-targeted Abs (representative results for  $n \geq 3$  donors). **(E)** Murine (NSG)-BMDM phagocytosis of Saos-2 tumor cells in the presence of T-cell-secreted SiRP $\alpha$ -monomer along with Cetuximab or/and Avelumab ( $n=3$ ). **(F)** Frequency of AnnexinV<sup>+</sup>DAPI<sup>+</sup> cells, corrected to tumor alone, 24h post-co-culture with A97L-T-cells at E:T=1:1 in the presence or not of Cetuximab or/and Avelumab ( $n=3$ ). **(G)** T-cell-secreted IFN $\gamma$  levels 24h post-stimulation with A375 tumor cells at E:T=1:1 in the presence or not of Cetuximab or/and Avelumab ( $n \geq 3$ ). Statistical analysis by two-way analysis of variance (ANOVA) (A-B) or one-way ANOVA (E-G), with correction for multiple comparisons by post hoc Sidak's test (A-B) or post hoc Tukey's test (E-G). \*\*\*\*P < 0.0001; \*\*\*P < 0.001; \*\*P < 0.01; \*P < 0.05.

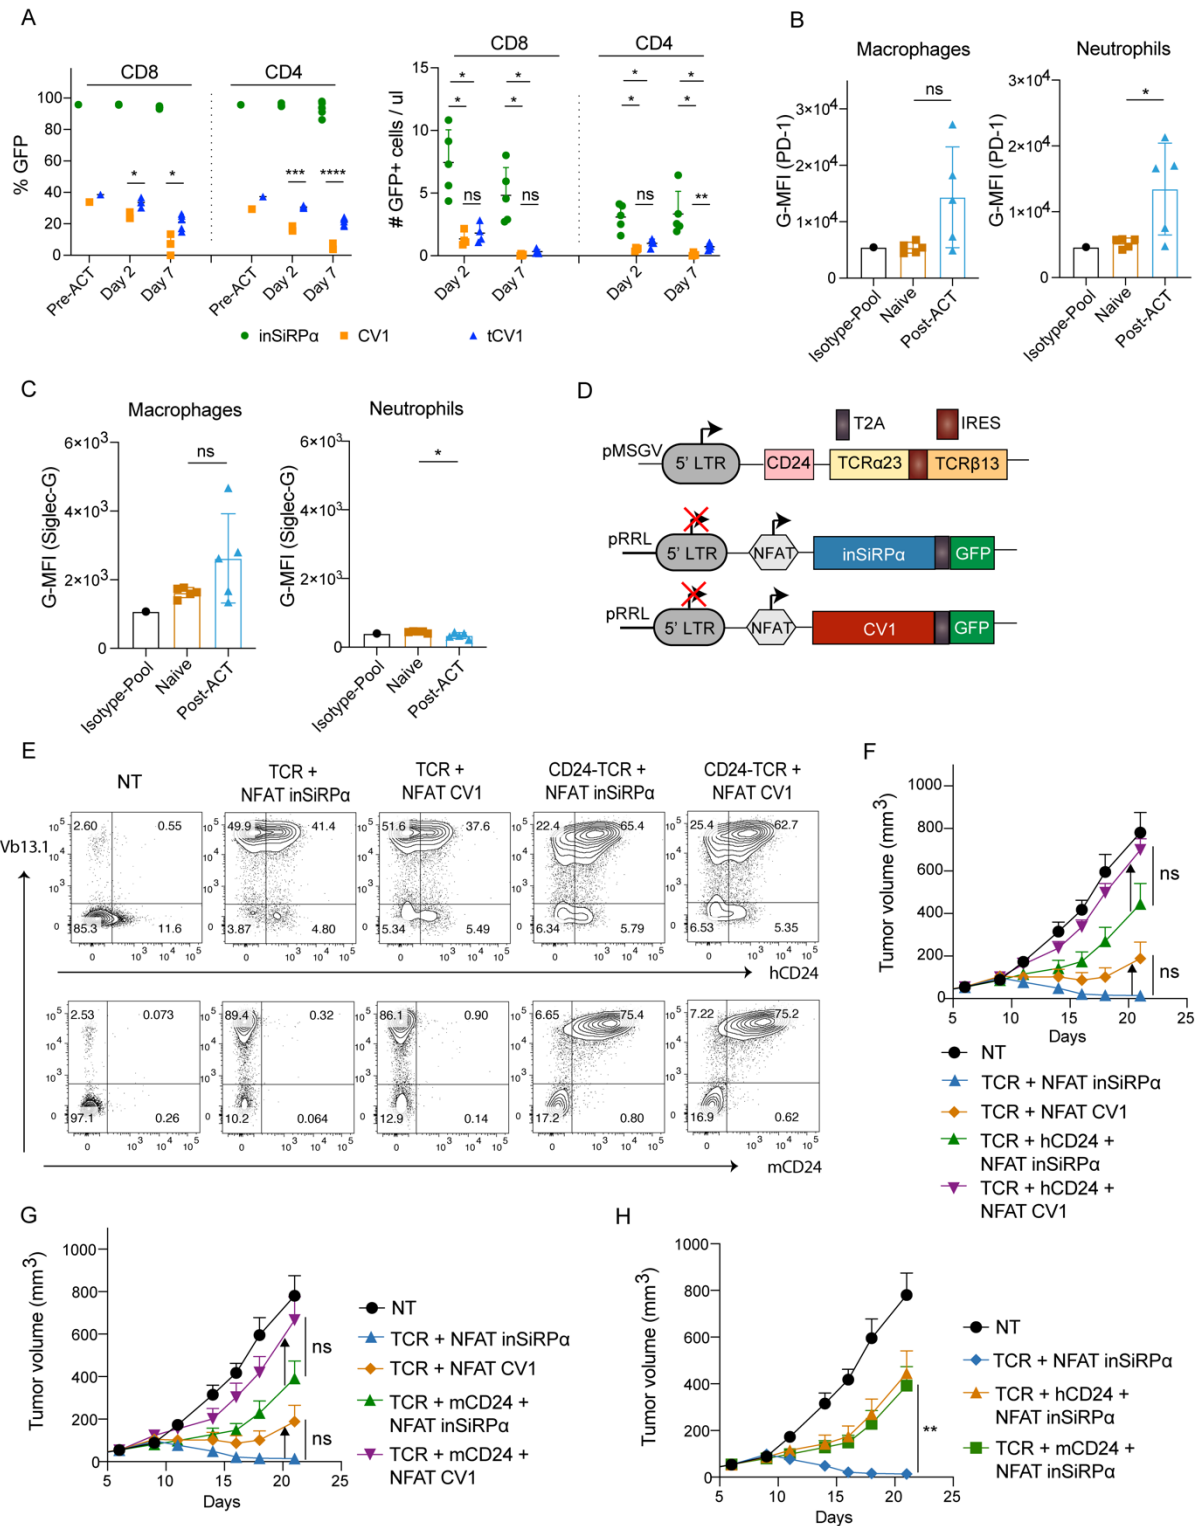

**Supplemental Figure 8. SiRP $\alpha$ -monomer engineered human T-cells are phagocytosed by NSG macrophages but not human macrophages. (A)** Frequency (left) and numbers per ul (right) of SiRP $\alpha$ -secreting GFP<sup>+</sup> cells in the blood of NSG mice ( $n \geq 4$ , representative results from  $n = 2$  independent experiments). **(B)** Expression of mouse PD-1 on the surface of tumor-associated macrophages (left) and neutrophils (left) in established A375 tumors in vivo, pre- and post-ACT ( $n = 5$ ). **(C)** Expression of

mouse Siglec-G on the surface of tumor-associated macrophages (left) and neutrophils (left) in established A375 tumors in vivo, pre- and post-ACT (n=5). **(D)** Schematic of lentiviral constructs encoding SiRP $\alpha$ -decoys under 6xNFAT and of a retroviral construct encoding mouse or human CD24 together with A97L TCR. **(E)** Expression of human (top panel) or mouse (bottom panel) CD24 and A97L-TCR in transduced CD8<sup>+</sup> T-cells, detected by anti-CD24 and anti-V $\beta$ 13.1 Ab staining, respectively (data representative of n=3 donors). **(F-H)** A375 tumor growth and control curves following ACT with T-cells co-engineered with monomeric SiRP $\alpha$  decoys and human CD24 **(F&H)** or mouse **(G&H)** CD24 (n=8, representative results from n=2 independent experiments). Statistical analysis by two-way analysis of variance (ANOVA) (A and F-H) or unpaired, two-tailed t test (B and C) with correction for multiple comparisons by post hoc Tukey's test (A and F-H). \*\*\*\*P < 0.0001; \*\*\*P < 0.001; \*\*P < 0.01; \*P < 0.05.

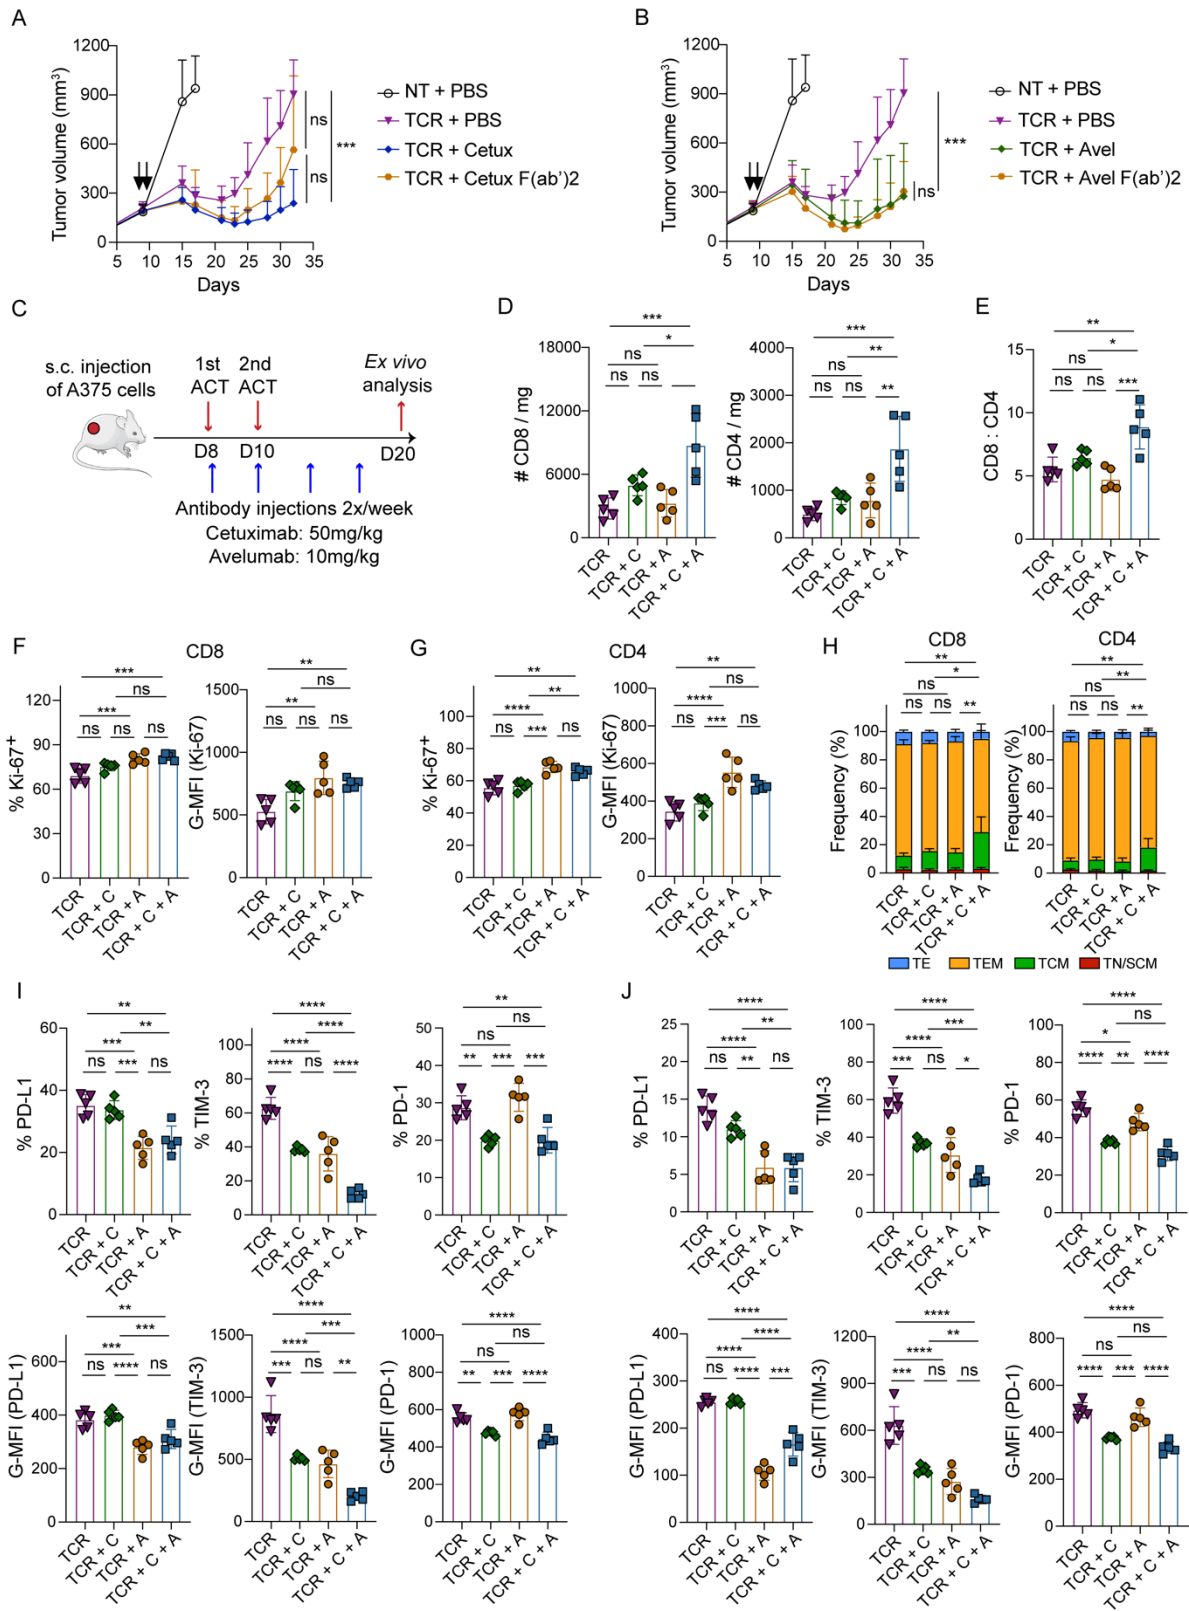

**Supplemental Figure 9. Co-administration of tumor-targeted monoclonal antibodies augments the anti-tumor activity of adoptively transferred A97L-T-cells. (A)** Control of A375 tumors in NSG mice following adoptive transfer of A97L-T-cells with co-administration of Cetuximab F(ab')<sub>2</sub>

fragments or Cetuximab ('C'; n=7). **(B)** Control of A375 tumors in NSG mice following adoptive transfer of A97L-T-cells with co-administration of Avelumab F(ab')<sub>2</sub> fragments or Avelumab ('A'; n=7). **(C)** Schematic of ACT study and ex vivo analysis 10 days post-ACT. **(D)** Number of intratumoral human CD8<sup>+</sup> (left) and CD4<sup>+</sup> (right) T-cells per mg of tumor (n=5). **(E)** Ratio of intratumoral CD8<sup>+</sup>:CD4<sup>+</sup> human T-cell frequency (n=5). **(F)** Frequency (left) and G-MFI (right) of Ki-67 expression within intratumoral human CD8<sup>+</sup>T-cells (n=5). **(G)** Frequency (left) and G-MFI (right) of Ki-67 expression within intratumoral human CD4<sup>+</sup>T-cells (n=5). **(H)** Frequency of effector and memory phenotypes of intratumoral CD8<sup>+</sup> (left) and CD4<sup>+</sup> (right) T-cells (n=5) (Effector, T<sub>E</sub>; Effector Memory, T<sub>EM</sub>; Central Memory, T<sub>CM</sub>; Naïve/Stem-cell like Memory, T<sub>N/SCM</sub>). **(I)** Frequency (upper panel) and G-MFI (lower panel) of checkpoint receptors in CD8<sup>+</sup>A97L-T-cells (n=5). **(J)** Frequency (upper panel) and G-MFI (lower panel) of checkpoint receptors in CD4<sup>+</sup>A97L-T-cells (n=5). Statistical analysis by two-way analysis of variance (ANOVA) (A-B) or one-way ANOVA (D-J) with correction for multiple comparisons by post hoc Tukey's test (A-B&D-J). \*\*\*\*P < 0.0001; \*\*\*P < 0.001; \*\*P < 0.01; \*P < 0.05.

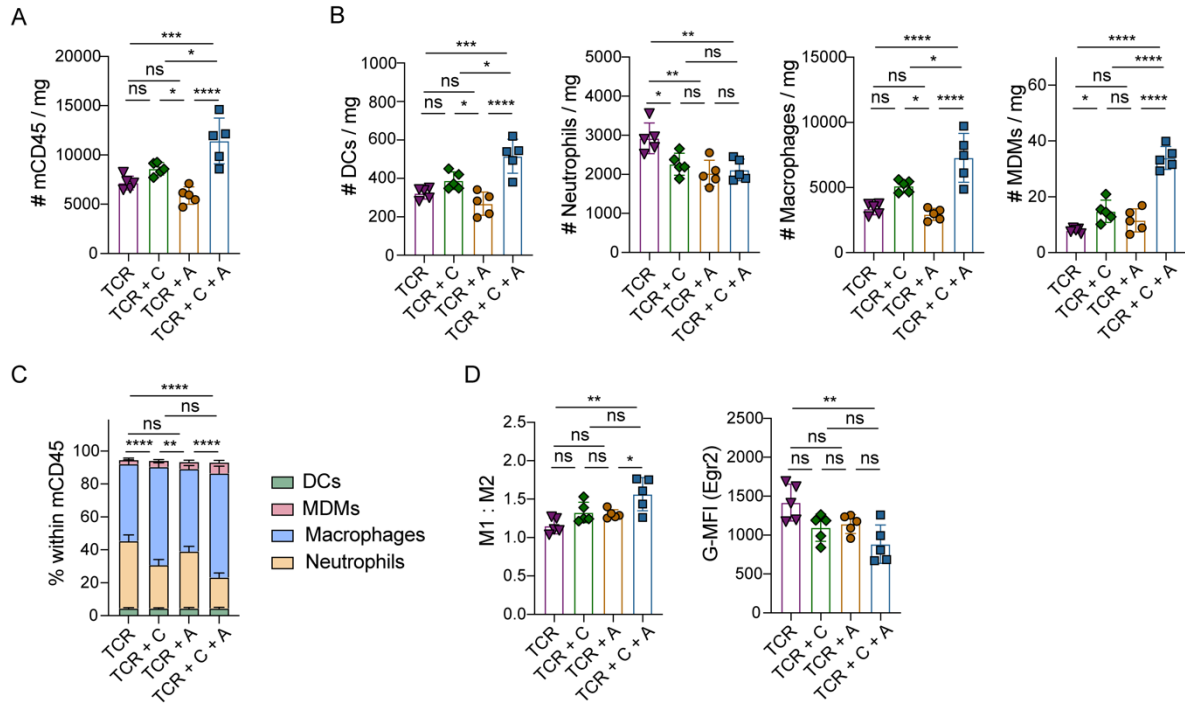

**Supplemental Figure 10. Co-administration of tumor-targeted monoclonal antibodies mobilizes and activates the endogenous innate immune system. (A)** Number of intratumoral mouse CD45<sup>+</sup> cells per mg of tumor 10 days post-ACT +/- Cetuximab ('C') or/and Avelumab ('A'; n=5). **(B)** Number of intratumoral mouse dendritic cells (DCs), neutrophils, macrophages, and monocytic-derived macrophages (from left to right) per mg of tumor (n=5). **(C)** Frequency of mouse myeloid populations within the CD45<sup>+</sup> compartment (n=5). **(D)** Ratio of M1:M2 macrophages based on the frequency of CD38<sup>+</sup> (M1) and Egr2<sup>+</sup> cells (M2) cells, and G-MFI of M2 marker Egr2 (right) (n=5). Statistical analysis by one-way analysis of variance (ANOVA) (A-D) with correction for multiple comparisons by post hoc Tukey's test (A-D). \*\*\*\*P < 0.0001; \*\*\*P < 0.001; \*\*P < 0.01; \*P < 0.05.



**Supplemental Table 1. Antibodies used in flow cytometry experiments.**

| <b>RESOURCE</b>                                      | <b>Clone</b> | <b>Source</b>            | <b>Identifier</b> | <b>Concentration</b>                         |
|------------------------------------------------------|--------------|--------------------------|-------------------|----------------------------------------------|
| <b>Antibodies or stains for Flow Cytometry</b>       |              |                          |                   | <b>µl per 100µl or working concentration</b> |
| Human CD4-Phycoerythrin (PE)                         | SK3          | Biolegend                | #344606           | 0.5ul                                        |
| Human CD4-Allophycocyanin (APC)                      | SK3          | Biolegend                | #344614           | 1ul                                          |
| Human CD4-Brilliant Violet 605 (BV605)               | OKT4         | Biolegend                | #317438           | 0.5ul                                        |
| Human CD4-Spark UV 387 (BUV387)                      | SK3          | Biolegend                | #344686           | 2ul                                          |
| Human CD8-Fluorescein Isothiocyanate (FITC)          | SK1          | Biolegend                | #344704           | 1ul                                          |
| Human CD8- Allophycocyanin (APC)                     | SK1          | Biolegend                | #344722           | 1ul                                          |
| Human CD8-Brilliant Violet 650 (BV650)               | RPA-T8       | Biolegend                | #301042           | 0.5ul                                        |
| Human/Mouse CD11b Phycoerythrin-Cy7 (PE-Cy7)         | M1/70        | Biolegend                | #101215           | 1ul                                          |
| Human CD45-Phycoerythrin-Cy5 (PE-Cy5)                | H130         | Biolegend                | #304010           | 0.1ul                                        |
| Human CD45-Brilliant Violet 785 (BV785)              | HI30         | Biolegend                | #304048           | 0.5ul                                        |
| Human CD45RA-ECD                                     | 2H4          | Beckman Coulter          | #B49193           | 0.5ul                                        |
| Human CD47-Fluorescein Isothiocyanate (FITC)         | CC2C6        | Biolegend                | #323106           | 1ul                                          |
| Human CD47- Phycoerythrin-Cy7 (PE-Cy7)               | CC2C6        | Biolegend                | #323114           | 1ul                                          |
| Human CD64 (Fc receptor I)-Allophycocyanin           | 10.1         | Biolegend                | #305014           | 1ul                                          |
| Human CD69-Alexa Fluor 700 (AF700)                   | FN50         | Biolegend                | #310922           | 1ul                                          |
| Human CD137 (4-1BB)-Brilliant Violet 711 (BV711)     | 4B4-1        | BD Biosciences           | #740798           | 1ul                                          |
| Human CD197 (CCR7)-Allophycocyanin-Cy7 (APC-Cy7)     | G043H7       | Biolegend                | #353212           | 2ul                                          |
| Human CD223 (LAG3)-PerCP-eFluor710                   | 3DS223H      | Thermo Fisher Scientific | #46-2239-42       | 1ul                                          |
| Human CD274 (PD-L1)- Brilliant Violet 421 (BV421)    | 29E.2A3      | Biolegend                | #329714           | 1ul                                          |
| Human CD279 (PD-1)-Allophycocyanin-Cy7 (APC-Cy7)     | NAT105       | Biolegend                | #467415           | 1ul                                          |
| Human CD340 (HER2)-Brilliant Violet 421 (BV421)      | 24D2         | Biolegend                | #324420           | 2ul                                          |
| Human CD366 (TIM3)-Brilliant Violet 421 (BV421)      | F38-2E2      | Biolegend                | #345013           | 1ul                                          |
| Human EGFR-Phycoerythrin (PE)                        | AY13         | Biolegend                | #352903           | 2ul in cell pellet                           |
| Human MCSP (CSPG4)-Fluorescein Isothiocyanate (FITC) | EP-1         | Miltenyi Biotec          | #130-098-794      | 1ul                                          |
| Human Ki-67-Brilliant Violet 421 (BV421)             | Ki-67        | Biolegend                | #350505           | 2ul                                          |
| Human TCR Vbeta13.1- Phycoerythrin (PE)              | IMMU 222     | Beckman Coulter          | #IM2292           | 7ul in cell pellet                           |
| Human IgG Fc- Phycoerythrin (PE)                     | HP6017       | Biolegend                | #409304           | 0.5ul                                        |
| Mouse CD11c- Brilliant Violet 605 (BV605)            | N418         | Biolegend                | #117333           | 1ul                                          |

|                                                                                   |            |                                                             |              |                    |
|-----------------------------------------------------------------------------------|------------|-------------------------------------------------------------|--------------|--------------------|
| Mouse Egr2- Allophycocyanin (APC)                                                 | Erongr2    | Invitrogen                                                  | #17-6691-82  | 2ul                |
| Mouse CD38-Alexa Fluor 488 (AF488)                                                | 90         | Biolegend                                                   | #102714      | 2ul                |
| Mouse CD45-Phycoerythrin-Cy5 (PE-Cy5)                                             | 30F11      | Thermo Fisher Scientific                                    | #15-0451-82  | 0.2ul              |
| Mouse CD45-Phycoerythrin-Cy5.5 (PE-Cy5.5)                                         | 30-F11     | Thermo Fisher Scientific                                    | # 35-0451-82 | 0.1ul              |
| Mouse Ter119- Phycoerythrin-Cy7 (PE-Cy7)                                          | Ter119     | Thermo Fisher Scientific                                    | # 25-5921-82 | 0.5ul              |
| Mouse F4/80- Allophycocyanin-Cy7 (APC-Cy7)                                        | BM8        | Thermo Fisher Scientific                                    | #47-4801-82  | 1ul                |
| Mouse F4/80- Pacific Blue                                                         | BM8        | Biolegend                                                   | #123124      | 2ul                |
| Mouse Ly-6C-PerCP-Cyanine 5.5 (PerCP-Cy5.5)                                       | HK1.4      | Thermo Fisher Scientific                                    | #45-5932-82  | 0.5ul              |
| Mouse Ly-6G- Phycoerythrin-Cy7 (PE-Cy7)                                           | 1A8        | Biolegend                                                   | #127618      | 1ul                |
| Mouse CD172a (SiRPa)- Phycoerythrin-Dazzle (PE-Dazzle)                            | P84        | Biolegend                                                   | #144015      | 1ul                |
| Mouse IgG Fc-Phycoerythrin (PE)                                                   | Polyclonal | Antibodies-Online                                           | #ABIN2669885 | 2ul                |
|                                                                                   |            |                                                             |              |                    |
| Annexin V-V500                                                                    |            | BD Biosciences                                              | #561501      | 2.5ul              |
| Multimer against HLA-A*0201 / NY-ESO-1157-165 SLLMWITQC - Phycoerythrin (PE)      |            | TCMetrix / Tetramer Core Facility in University of Lausanne |              | 2ul in cell pellet |
| Multimer against HLA-A*0201 / Melan-A-MART-126-35 EAAGIGILTV - Phycoerythrin (PE) |            | TCMetrix / Tetramer Core Facility in University of Lausanne |              | 1ul in cell pellet |
| Human TruStain FcX™ (Fc Receptor Blocking Solution)                               |            | Biolegend                                                   | #422301      | 10ug/ml            |
| Purified Rat Anti-Mouse CD16/CD32 (Mouse Fc Block)                                | 2.4G2      | BD Pharmingen                                               | #553142      | 10ug/ml            |
| Invitrogen™ LIVE/DEAD™ Fixable Aqua Dead Cell Stain Kit, for 405 nm excitation    |            | ThermoFisher Scientific                                     | #L34957      | 1/200              |
| DAPI (4',6-Diamidino-2-Phenylindole, Dilactate)                                   |            | Sigma-Aldrich                                               | #D9542       | 100ng/ml           |
